# Supplementary material for: Essential Oil Composition and Bioactive Properties of Lemon Balm Aerial Parts as Affected by Cropping System and Irrigation Regime
Source: MDPI journal article supplement (doi:10.3390/agronomy12030649), 2022-03-07
Supplement: s1 [file s1]

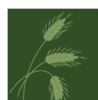

**Table S1.** Fertilizers and crop protection means applied during the experimental study.

|                    | Organic                                                  |                           |                     | Conventional                                             |                           |                     |
|--------------------|----------------------------------------------------------|---------------------------|---------------------|----------------------------------------------------------|---------------------------|---------------------|
|                    | Product, Company,<br>Origin                              | Number of<br>Applications | Application<br>Mode | Product, Company,<br>Origin                              | Number of<br>Applications | Application<br>Mode |
| Fertilizer         | OASIS BIO<br>(Italpollina Spa, Italy)                    | 4                         | S                   | 20-20-20 (Plant Prod, Canada)                            | 5                         | S                   |
|                    | Fe-Chelate DISPER<br>FER 6% (Disper, Spain)              | 1                         | S                   | Fe-Chelate DISPER<br>FER 6% (Disper, Spain)              | 1                         | S                   |
|                    | KELP-100<br>(Agrichem, Australia)                        | 2                         | F                   | Razormin (Atlantica Agricola, Spain)                     | 5                         | S                   |
|                    | TRAINER<br>(Itapollina Spa, Italy)                       | 1                         | F                   |                                                          |                           |                     |
| Crop<br>Protection | KONFLIC<br>(Atlantica Agricola, Spain)                   | 1                         | F                   | KONFLIC (Atlantica Agricola, Spain)                      | 1                         | F                   |
|                    | TRACER (Dow Agrosiences, France)                         | 4                         | F                   | TRACER (Dow Agrosiences, France)                         | 4                         | F                   |
|                    | THIOVIT 80 WP<br>(Syngenta Crop protection, Switzerland) | 1                         | F                   | THIOVIT 80 WP<br>(Syngenta Crop protection, Switzerland) | 1                         | F                   |
|                    | Sulphur<br>Microbagnabile<br>(Solfotecnica, Italy)       | 1                         | S                   | Sulphur<br>Microbagnabile<br>(Solfotecnica, Italy)       | 1                         | S                   |

F: indicated foliar application; S: indicated soil application
